# Supplementary material for: Endothelial Damage, Neutrophil Extracellular Traps and Platelet Activation in COVID-19 vs. Community-Acquired Pneumonia: A Case–Control Study
Source: MDPI journal article supplement (doi:10.3390/ijms241713194), 2023-08-25
Supplement: s1 [file s1]

## SUPPLEMENTAL FILE

**Table S1: Baseline characteristics, severity and respiratory support in initial CAP cohort.**

|                                                                                          | <i>Initial CAP cohort<br/>(n=1115)</i> |
|------------------------------------------------------------------------------------------|----------------------------------------|
| <i>Age, years, median (1<sup>st</sup> quartile, 3<sup>rd</sup> quartile)</i>             | 72 (59,81)                             |
| <i>Male sex, no. (%)</i>                                                                 | 693 (62.2)                             |
| <i>Current or former smokers, no. (%)</i>                                                | 650 (59.9)                             |
| <i>Coexisting conditions, no. (%)</i>                                                    |                                        |
| <i>HTA</i>                                                                               | 591 (53.2)                             |
| <i>Diabetes</i>                                                                          | 308 (27.6)                             |
| <i>Dyslipidemia</i>                                                                      | 233 (42.7)                             |
| <i>Overweight*</i>                                                                       | 327 (29.5)                             |
| <i>COPD</i>                                                                              | 228 (20.5)                             |
| <i>Asthma</i>                                                                            | 86 (7.7)                               |
| <i>Chronic heart disease</i>                                                             | 373 (33.5)                             |
| <i>Chronic renal disease</i>                                                             | 149 (13.4)                             |
| <i>Neurological disease</i>                                                              | 185 (16.6)                             |
| <i>SpO2/FiO2 at admission, median (1<sup>st</sup> quartile, 3<sup>rd</sup> quartile)</i> | 442.9 (417.6, 456.7)                   |
| <i>Bilateral infiltrates at admission, no. (%)</i>                                       | 203 (18.2)                             |
| <i>Maximum respiratory support, no. (%)</i>                                              |                                        |
| <i>No respiratory support</i>                                                            | 434 (39.3)                             |
| <i>O2 nasal cannula</i>                                                                  | 442 (40)                               |
| <i>O2 venturi/reservoir mask</i>                                                         | 155 (14)                               |
| <i>HFNC/CPAP/NIMV</i>                                                                    | 48 (4.3)                               |
| <i>MV</i>                                                                                | 25 (2.3)                               |

*\*Body mass index  $\geq 25$ .*

**Table S2: Characteristics of healthy controls.**

|                                                                              | <i>Healthy controls<br/>(n=50)</i> |
|------------------------------------------------------------------------------|------------------------------------|
| <i>Age, years, median (1<sup>st</sup> quartile, 3<sup>rd</sup> quartile)</i> | <i>43 (40,49)</i>                  |
| <i>Male sex, no. (%)</i>                                                     | <i>17 (34)</i>                     |
| <i>Current or former smokers, no. (%)</i>                                    | <i>5 (10)</i>                      |
| <i>Coexisting conditions, no. (%)</i>                                        |                                    |
| <i>HTA</i>                                                                   | <i>3 (6)</i>                       |
| <i>Diabetes</i>                                                              | <i>0 (0)</i>                       |
| <i>Dyslipidemia</i>                                                          | <i>4 (8)</i>                       |
| <i>Overweight*</i>                                                           | <i>NA</i>                          |
| <i>COPD</i>                                                                  | <i>0 (0)</i>                       |
| <i>Asthma</i>                                                                | <i>1 (2)</i>                       |
| <i>Chronic heart disease</i>                                                 | <i>1 (2)</i>                       |
| <i>Chronic renal disease</i>                                                 | <i>0 (0)</i>                       |
| <i>Neurological disease</i>                                                  | <i>0 (0)</i>                       |

*NA: not available. \*Body mass index  $\geq 25$*
